# Supplementary material
Source: PubMed Central journal article supplement (PMC3231961)
Supplement: supp_11-0258_Online_Supplement.pdf [file supp_11-0258_Online_Supplement.pdf]

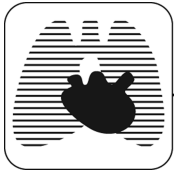

## Pericardial Fat Is Associated With Impaired Lung Function and a Restrictive Lung Pattern in Adults

### The Jackson Heart Study

DeMarc A. Hickson, PhD, MPH; Jiankang Liu, MD, PhD;  
Aurelian Bidulescu, MD, PhD, MPH; Cecil M. Burchfiel, PhD, MPH;  
Herman A. Taylor, MD, MPH; and Marcy F. Petrini, PhD, FCCP

**e-Table 1.** Sex-specific standardized mean differences in lung function per standard deviation increase in pericardial fat in multivariable adjusted models\*.

|                                  | Women      |        | Men        |        |
|----------------------------------|------------|--------|------------|--------|
| CRP Adjustment (n = 1,273)       |            |        |            |        |
| FEV <sub>1</sub> % predicted     | -0.95±0.65 | 0.141  | -1.08±0.83 | 0.195  |
| FVC % predicted                  | -2.05±0.59 | <0.001 | -2.21±0.71 | 0.002  |
| FEV <sub>1</sub> to FVC ratio    | 1.150.33   | <0.001 | 1.04±0.40  | 0.009  |
| Excluding Ever-smokers (n = 939) |            |        |            |        |
| FEV <sub>1</sub> % predicted     | -1.61±0.72 | 0.026  | -1.59±1.05 | 0.130  |
| FVC % predicted                  | -2.53±0.67 | <0.001 | -3.28±0.89 | <0.001 |
| FEV <sub>1</sub> to FVC ratio    | 1.07±0.38  | 0.005  | 1.35±0.50  | 0.008  |
| Excluding T2D & CVD (n = 1,064)  |            |        |            |        |
| FEV <sub>1</sub> % predicted     | -1.03±0.69 | 0.138  | -1.97±0.83 | 0.018  |
| FVC % predicted                  | -2.03±0.64 | 0.001  | -2.98±0.78 | <0.001 |
| FEV <sub>1</sub> to FVC ratio    | 1.07±0.37  | 0.004  | 0.92±0.41  | 0.025  |

Abbreviations: CRP = C reactive protein; FEV<sub>1</sub> = Forced expiratory volume in 1 second; FVC = Forced vital capacity; T2D = Type 2 diabetes; CVD = Cardiovascular disease

\*Multivariable adjusted model (Model 1) includes age, education, cigarette smoking status, pack-years of smoking, respiratory medication use, and physical activity.

Online supplements are not copyedited prior to posting.
